# Supplementary material for: Cadmium Body Burden and Inflammatory Arthritis: A Pilot Study in Patients from Lower Silesia, Poland
Source: MDPI journal article supplement (doi:10.3390/ijerph19053099), 2022-03-06
Supplement: s1 [file s1]

$$P(x) = \frac{e^{9.9 + 1.49 * Cd-B \geq 0.65 \mu g/L + 2.36 * (8-OHdG \geq 7.66 ng/mL) + 1.76 * COX-2 \geq 22.9 ng/mL - 0.39 * MCH + 1.29 * frequent consumption of offal}}{1 - e^{9.9 + 1.49 * Cd-B \geq 0.65 \mu g/L + 2.36 * (8-OHdG \geq 7.66 ng/mL) + 1.76 * COX-2 \geq 22.9 ng/mL - 0.39 * MCH + 1.29 * frequent consumption of offal}}$$

where: P(x) – probability of IA in the study population.
