# Supplementary material for: Cadmium Body Burden and Inflammatory Arthritis: A Pilot Study in Patients from Lower Silesia, Poland
Source: MDPI journal article supplement (doi:10.3390/ijerph19053099), 2022-03-06
Supplement: s1 [file s1]

**QUESTIONNAIRE** regarding a study entitled 'Cadmium burden and inflammatory processes, antioxidant damage, and immune system regulation in individuals with autoimmune diseases' /

We would be grateful for your feedback on the following questionnaire

1. Age.....years

2. Sex FEMALE ☐

MALE ☐

3. Education

Higher ☐ Secondary ☐ Vocational/primary ☐

4. Occupation performed .....

5. Chronic diseases .....

6. Place of residence

Large city YES NO

Medium-sized city YES NO

Smaller town, village YES NO

Busy street, heavy car traffic YES NO

Periphery, residential area / low car traffic volume YES NO

Proximity of low emission sources / heating of homes with coal-fired furnaces YES NO

Exposure to passive smoking at home YES NO

How long have you lived in your current place of residence? ...../ if 10 years or more → 7 points

Previous place of residence

Large city YES NO

Medium-sized city YES NO

Smaller town, village YES NO

Busy street, heavy car traffic YES NO

Periphery, residential area / low car traffic volume YES NO

Proximity of low emission sources / heating of homes with coal-fired furnaces YES NO

Exposure to passive smoking at home YES NO

7. Place of work

Employment/now YES Employment/now NO (pensioner, retired, unemployed)

Job seniority .....years

Place of work

Occupational exposure to cadmium / metallurgy, welding, chemical industry, plastics production, car mechanic YES NO

Busy street, heavy car traffic YES NO

Periphery / low car traffic volume YES NO

Proximity of low emission sources / heating of homes with coal-fired furnaces YES NO

Exposure to passive smoking at work YES NO

Commuting to work

- public transport ☐
- car ☐
- on foot ☐

How long you have been employed at your current workplace? ...../ if 10 years or more —————> **8 points**

Previous place of work

Occupational exposure to cadmium / metallurgy, welding, chemical industry, plastics production, car mechanic **YES**  
**NO**

Busy street, heavy car traffic **YES** **NO**

Periphery / low car traffic volume **YES** **NO**

Proximity of low emission sources / heating of homes with coal-fired furnaces **YES** **NO**

Exposure to passive smoking at work **YES** **NO**

Commuting to work

- public transport ☐
- car ☐
- on foot ☐

### 8. Lifestyle

Vegetarian diet **YES** **NO**

Frequent consumption of offal **NO** / at least once a week / **YES** several times a week / **YES**

High consumption of legumes **NO** / at least once a week / **YES** / several times a week / **YES**

Tobacco smoking **YES** **NO**

If **YES**, how long: .....years

Tobacco smoking **YES** / **addictive, about a pack a day** ☐ **half a pack a day** ☐

Tobacco smoking **YES** / **rarely, occasionally, e.g. at parties** ☐

Tobacco smoking **NO** ☐

Quitting smoking

How long ago? .....years

How long had you been smoking before? .....years

Cosmetic use / for women

Lipstick **YES / every day** ☐

Lipstick **YES / occasionally** ☐

Lipstick **NO** ☐

Powder/foundation **YES / every day** ☐

Powder/foundation **YES / occasionally** ☐

Powder/foundation **NO** ☐

Eyeshadows **YES / every day** ☐

Eyeshadows **YES / occasionally** ☐

Eyeshadows **NO** ☐

**Leisure time / how do you spend it most often?**

At home / TV, computer, books ☐

Going out to town / cafes, cinema, events ☐

Trips out of town / excursions ☐

Walks in a park ☐

In a different way: how? .....

**Thank you for completing the questionnaire.**
