# Supplementary material for: Cadmium Body Burden and Inflammatory Arthritis: A Pilot Study in Patients from Lower Silesia, Poland
Source: Int J Environ Res Public Health. 2022 Mar 6;19(5):3099. doi: 10.3390/ijerph19053099 (PMC8910441; doi:10.3390/ijerph19053099)
Supplement: Supplementary file 1 [file ijerph-19-03099-s001.zip]

Archive with 4 entries (4 files):
- Figure 1..eps
- Figure 2.eps
- QUESTIONNAIRE.pdf
- Equation (Binary logistic regression model).pdf
